# Supplementary material
Source: PubMed Central journal article supplement (PMC5033718)
Supplement: NIHMS812662-supplement-Supplemental_Material.pdf [file NIHMS812662-supplement-Supplemental_Material.pdf]

**Supplemental Table I. Baseline characteristics of 292 study participants according cocaine use status, Baltimore, Maryland**

| Characteristic                                                                            | Cocaine use status |                |                    | P value |
|-------------------------------------------------------------------------------------------|--------------------|----------------|--------------------|---------|
|                                                                                           | Never<br>(n=57)    | Past<br>(n=82) | Current<br>(n=153) |         |
| Female, n (%)                                                                             | 19 (33)            | 28 (34)        | 39 (25)            | 0.29    |
| Age, years, median (P <sub>25</sub> , P <sub>75</sub> )                                   | 46 (41, 53)        | 51 (46, 54)    | 49 (45, 52)        | 0.019   |
| African American, n (%)                                                                   | 54 (95)            | 75 (91)        | 144 (94)           | 0.70    |
| Smoking status, n (%)                                                                     |                    |                |                    |         |
| Never                                                                                     | 32 (56)            | 11 (13)        | 30 (20)            | <0.001  |
| Past                                                                                      | 8 (14)             | 17 (21)        | 9 (6)              |         |
| Current                                                                                   | 17 (30)            | 54 (66)        | 114 (75)           |         |
| Hypertension, n (%)                                                                       | 12 (21)            | 34 (41)        | 42 (27)            | 0.024   |
| Taking antihypertensive medication, n (%)                                                 | 14 (25)            | 29 (35)        | 39 (25)            | 0.23    |
| Systolic blood pressure, mm Hg, median (P <sub>25</sub> , P <sub>75</sub> )               | 124 (114, 135)     | 122 (112, 131) | 121 (108, 132)     | 0.41    |
| Body mass index, kg/m <sup>2</sup> , median (P <sub>25</sub> , P <sub>75</sub> )          | 29 (25, 34)        | 26 (23, 32)    | 25 (22, 30)        | 0.006   |
| eGFR*, mL/min/1.73m <sup>2</sup> , median (P <sub>25</sub> , P <sub>75</sub> )            | 108 (94, 114)      | 101 (84, 119)  | 101 (87, 120)      | 0.33    |
| ≥90 mL/min/1.73m <sup>2</sup> , n (%)                                                     | 46 (81)            | 55 (67)        | 106 (69)           | 0.37    |
| 60-89 mL/min/1.73m <sup>2</sup> , n (%)                                                   | 11 (19)            | 25 (30)        | 42 (27)            |         |
| <60 mL/min/1.73m <sup>2</sup> , n (%)                                                     | 0                  | 2 (2)          | 5 (3)              |         |
| Total to HDL cholesterol ratio <sup>b</sup> , median (P <sub>25</sub> , P <sub>75</sub> ) | 3.2 (2.6, 4.3)     | 3.5 (2.6, 4.3) | 2.9 (2.4, 3.8)     | 0.015   |
| Using HMG-CoA reductase inhibitor, n (%)                                                  | 7 (12)             | 13 (16)        | 11 (7)             | 0.10    |
| Self-reported history of CVD†, n (%)                                                      | 5 (9)              | 10 (12)        | 10 (7)             | 0.34    |
| ACC/AHA CVD risk score‡, median (P <sub>25</sub> , P <sub>75</sub> )                      | 4.0 (2.3, 6.3)     | 6.0 (3.1, 9.7) | 6.1 (2.6, 9.5)     | 0.027   |
| HIV-positive, n (%)                                                                       | 26 (46)            | 58 (71)        | 108 (71)           | 0.002   |
| Active hepatitis C virus, n (%)                                                           | 5 (9)              | 36 (44)        | 74 (48)            | <0.001  |
| Number of study visits completed, median (P <sub>25</sub> , P <sub>75</sub> )             | 6 (5, 7)           | 6 (6, 7)       | 6 (5, 7)           | 0.67    |

HDL, high density lipoprotein; HMG-CoA, 3-hydroxy-3-methylglutaryl-coenzyme A

\*Glomerular filtration rate estimated with serum creatinine using the CKD-EPI equation.

† 25 participants reported one or more prior CVD events at baseline including 1) "heart attack" (n=5), "open heart surgery for blocked blood vessels" (n=2), "balloon treatment or stent placed in heart" (n=1), or "stroke or mini-stroke" (n=21).

‡ACC/AHA CVD risk score<sup>25</sup> is the predicted 10-year risk of cardiovascular disease derived from an equation that includes age, sex, race, total cholesterol, HDL cholesterol, diabetes, systolic blood pressure, smoking status, and use of antihypertensive medication. Point estimates are expressed per 5 percentage point increase in the risk score.

**Supplemental Table II. Associations of HIV, cocaine use, and hepatitis C with carotid artery plaque and intima-media thickness among 279 participants, Baltimore, Maryland, adjusted for individual CVD risk factors**

| Risk factor               | Presence of carotid plaque at baseline |                                |                               | Carotid plaque progression                 |                                |                               |
|---------------------------|----------------------------------------|--------------------------------|-------------------------------|--------------------------------------------|--------------------------------|-------------------------------|
|                           | Frequency (%)                          | Unadjusted OR (95% CI)         | Adjusted* OR (95% CI)         | Frequency (%)                              | Unadjusted OR (95% CI)         | Adjusted* OR (95% CI)         |
| <b>Cocaine use</b>        |                                        |                                |                               |                                            |                                |                               |
| Never (n=55)              | 16 (29)                                | ref.                           | ref.                          | 9 (20)                                     | ref.                           | ref.                          |
| Past (n=78)               | 49 (63)                                | 4.1 (2.0, 8.6)†                | 2.8 (1.1, 6.6)‡               | 27 (42)                                    | 2.9 (1.2, 7.1)‡                | 1.6 (0.6, 4.2)                |
| Current (n=146)           | 84 (58)                                | 3.3 (1.7, 6.4)†                | 2.8 (1.2, 5.6)‡               | 31 (28)                                    | 1.5 (0.7, 3.5)                 | 0.8 (0.3, 2.1)                |
| <b>HIV status</b>         |                                        |                                |                               |                                            |                                |                               |
| Negative (n=96)           | 79 (43)                                | ref.                           | ref.                          | 14 (20)                                    | ref.                           | ref.                          |
| Positive (n=183)          | 107 (57)                               | 1.5 (.9, 2.5)                  | 1.4 (0.8, 2.5)                | 53 (35)                                    | 2.2 (1.1, 4.4)‡                | 2.0 (1.0, 4.3)                |
| <b>Hepatitis C status</b> |                                        |                                |                               |                                            |                                |                               |
| Negative (n=169)          | 83 (49)                                | ref.                           | ref.                          | 32 (24)                                    | ref.                           | ref.                          |
| Positive (n=110)          | 66 (60)                                | 1.6 (1.0, 2.5)                 | 0.8 (0.5, 1.8)                | 35 (41)                                    | 2.3 (1.3, 4.1)‡                | 1.8 (0.9, 3.5)                |
|                           | Carotid IMT at baseline (µm)           |                                |                               | Annualized change in carotid IMT (µm/year) |                                |                               |
|                           | Mean ± sd                              | Unadjusted difference (95% CI) | Adjusted* difference (95% CI) | Mean ± sd                                  | Unadjusted difference (95% CI) | Adjusted* difference (95% CI) |
| <b>Cocaine use</b>        |                                        |                                |                               |                                            |                                |                               |
| Never (n=55)              | 788 ± 259                              | ref.                           | ref.                          | 16 ± 58                                    | ref.                           | ref.                          |
| Past (n=78)               | 852 ± 243                              | 64 (-26, 154)                  | 29 (-61, 120)                 | 16 ± 52                                    | -1 (-23, 22)                   | -14 (-38, 11)                 |
| Current (n=146)           | 852 ± 268                              | 64 (-17, 145)                  | 64 (-21, 149)                 | 14 ± 63                                    | -2 (-23, 18)                   | -13 (-36, 9)                  |
| <b>HIV status</b>         |                                        |                                |                               |                                            |                                |                               |
| Negative (n=96)           | 841 ± 224                              | ref.                           | ref.                          | 13 ± 43                                    | ref.                           | ref.                          |
| Positive (n=183)          | 839 ± 277                              | -2 (-67, 62)                   | -7 (-71, 57)                  | 16 ± 65                                    | 4 (-13, 20)                    | 4 (-14, 21)                   |
| <b>Hepatitis C status</b> |                                        |                                |                               |                                            |                                |                               |
| Negative (n=169)          | 825 ± 268                              | ref.                           | ref.                          | 9 ± 61                                     | ref.                           | ref.                          |
| Positive (n=110)          | 862 ± 246                              | 38 (-25, 99)                   | 3 (-61, 66)                   | 24 ± 55                                    | 15 (-1, 31)                    | 14 (-4, 31)                   |

OR, odds ratio; CI, confidence interval; ref., reference group; IMT, intima-media thickness; sd, standard deviation

\*Adjusted models include baseline covariates for age, sex, race, current smoking status, total to HDL cholesterol ratio, use of antihypertension drug and systolic blood pressure.

†P < 0.001

‡P < 0.05 and P ≥ 0.001

**Supplemental Table III. Associations of cocaine use, HIV, and hepatitis C with baseline albuminuria and albuminuria progression among 292 participants, Baltimore, Maryland, adjusted for individual CVD risk factors**

| Risk factor        | Presence of albuminuria at baseline |                        |                       | Albuminuria progression |                        |                       |
|--------------------|-------------------------------------|------------------------|-----------------------|-------------------------|------------------------|-----------------------|
|                    | Frequency (%)                       | Unadjusted OR (95% CI) | Adjusted* OR (95% CI) | Frequency (%)           | Unadjusted OR (95% CI) | Adjusted* OR (95% CI) |
| Cocaine use        |                                     |                        |                       |                         |                        |                       |
| Never (n=57)       | 5 (9)                               | ref.                   | ref.                  | 11 (19)                 | ref.                   | ref.                  |
| Past (n=82)        | 15 (18)                             | 2.3 (0.8, 6.8)         | 2.5 (0.7, 8.3)        | 16 (20)                 | 1.0 (0.4, 2.4)         | 0.6 (0.2, 1.6)        |
| Current (n=153)    | 23 (15)                             | 1.8 (0.7, 5.1)         | 2.1 (0.6, 6.7)        | 44 (29)                 | 1.7 (0.8, 3.6)         | 1.2 (0.5, 3.0)        |
| HIV status         |                                     |                        |                       |                         |                        |                       |
| Negative (n=100)   | 8 (8)                               | ref.                   | ref.                  | 14 (14)                 | ref.                   | ref.                  |
| Positive (n=192)   | 35 (18)                             | 2.6 (1.1, 5.8)†        | 1.8 (0.7, 4.4)        | 57 (30)                 | 2.6 (1.4, 4.9)†        | 2.2 (1.1, 4.5)†       |
| Hepatitis C status |                                     |                        |                       |                         |                        |                       |
| Negative (n=177)   | 22 (12)                             | ref.                   | ref.                  | 36 (20)                 | ref.                   | ref.                  |
| Positive (n=115)   | 21 (18)                             | 1.6 (0.8, 3.0)         | 1.2 (0.6, 2.5)        | 35 (30)                 | 1.7 (1.0, 2.9)         | 1.3 (0.7, 2.3)        |

OR, odds ratio; CI, confidence interval; ref., reference group

\* Adjusted models include baseline covariates for age, sex, race, current smoking status, total to HDL cholesterol ratio, use of antihypertension drug and systolic blood pressure.

†P < 0.05

**Supplemental Table IV. Associations of HIV, cocaine use, and hepatitis C with aortic pulse wave velocity among 288 participants, Baltimore, Maryland, adjusted for individual CVD risk factors**

| <b>Risk factor</b> | <b>Unadjusted difference, cm/s<br/>(95% CI)</b> | <b>Adjusted* difference, cm/s<br/>(95% CI)</b> |
|--------------------|-------------------------------------------------|------------------------------------------------|
| Cocaine use        |                                                 |                                                |
| Never              | ref.                                            | ref.                                           |
| Past               | 0 (-55, -55)                                    | -25 (-77, 27)                                  |
| Current            | -21 (-70, 28)                                   | -19 (-68, 29)                                  |
| HIV status         |                                                 |                                                |
| Negative           | ref.                                            | ref.                                           |
| Positive           | 31 (-8, 70)                                     | 41 (5, 78)†                                    |
| Hepatitis C status |                                                 |                                                |
| Negative           | ref.                                            | ref.                                           |
| Positive           | 26 (-12, 64)                                    | 13 (-23, 49)                                   |

ref., reference group

\* Adjusted models include baseline covariates for age, sex, race, current smoking status, total to HDL cholesterol ratio, use of antihypertension drug and systolic blood pressure.

†P < 0.05

**Supplemental Table V. Raw results of study outcome measures by study visit, overall and stratified by HIV status**

| Assessment                                | Study visit (months)  |     |                       |     |                       |     |                       |
|-------------------------------------------|-----------------------|-----|-----------------------|-----|-----------------------|-----|-----------------------|
|                                           | 0                     | 6   | 12                    | 18  | 24                    | 30  | 36                    |
| <b>Carotid plaque</b>                     |                       |     |                       |     |                       |     |                       |
| Frequency, n                              | 279                   |     |                       |     | 221                   |     |                       |
| Cohort overall, %                         | 53                    |     |                       |     | 62                    |     |                       |
| HIV-negative, %                           | 47                    |     |                       |     | 45                    |     |                       |
| HIV-positive, %                           | 57                    |     |                       |     | 71                    |     |                       |
|                                           |                       |     |                       |     |                       |     |                       |
| <b>Carotid IMT</b>                        |                       |     |                       |     |                       |     |                       |
| Frequency, n                              | 279                   |     |                       |     | 221                   |     |                       |
| Cohort overall, $\mu\text{m}$ ( $\pm$ sd) | 840<br>( $\pm$ 260)   |     |                       |     | 873<br>( $\pm$ 304)   |     |                       |
| HIV-negative, $\mu\text{m}$ ( $\pm$ sd)   | 841<br>( $\pm$ 224)   |     |                       |     | 859<br>( $\pm$ 237)   |     |                       |
| HIV-positive, $\mu\text{m}$ ( $\pm$ sd)   | 839<br>( $\pm$ 277)   |     |                       |     | 879<br>( $\pm$ 332)   |     |                       |
|                                           |                       |     |                       |     |                       |     |                       |
| <b>Albuminuria</b>                        |                       |     |                       |     |                       |     |                       |
| Frequency, n                              | 292                   | 250 | 257                   | 223 | 238                   | 143 | 239                   |
| Cohort overall, %                         | 15                    | 19  | 14                    | 21  | 13                    | 18  | 18                    |
| HIV-negative, %                           | 8                     | 8   | 7                     | 12  | 9                     | 8   | 11                    |
| HIV-positive, %                           | 18                    | 24  | 18                    | 25  | 16                    | 22  | 22                    |
|                                           |                       |     |                       |     |                       |     |                       |
| <b>Pulse wave velocity</b>                |                       |     |                       |     |                       |     |                       |
| Frequency, n                              | 279                   |     | 257                   |     | 234                   |     | 218                   |
| Cohort overall, m/s ( $\pm$ sd)           | 8.43<br>( $\pm$ 1.88) |     | 8.57<br>( $\pm$ 2.09) |     | 8.55<br>( $\pm$ 1.96) |     | 8.81<br>( $\pm$ 2.20) |
| HIV-negative, m/s ( $\pm$ sd)             | 8.22<br>( $\pm$ 1.78) |     | 8.26<br>( $\pm$ 1.82) |     | 8.34<br>( $\pm$ 2.02) |     | 8.75<br>( $\pm$ 1.96) |
| HIV-positive, m/s ( $\pm$ sd)             | 8.55<br>( $\pm$ 1.93) |     | 8.71<br>( $\pm$ 2.19) |     | 8.66<br>( $\pm$ 1.93) |     | 8.85<br>( $\pm$ 2.31) |
