# Supplementary material
Source: PubMed Central journal article supplement (PMC5033718)

# A triad of non-traditional cardiovascular risk factors

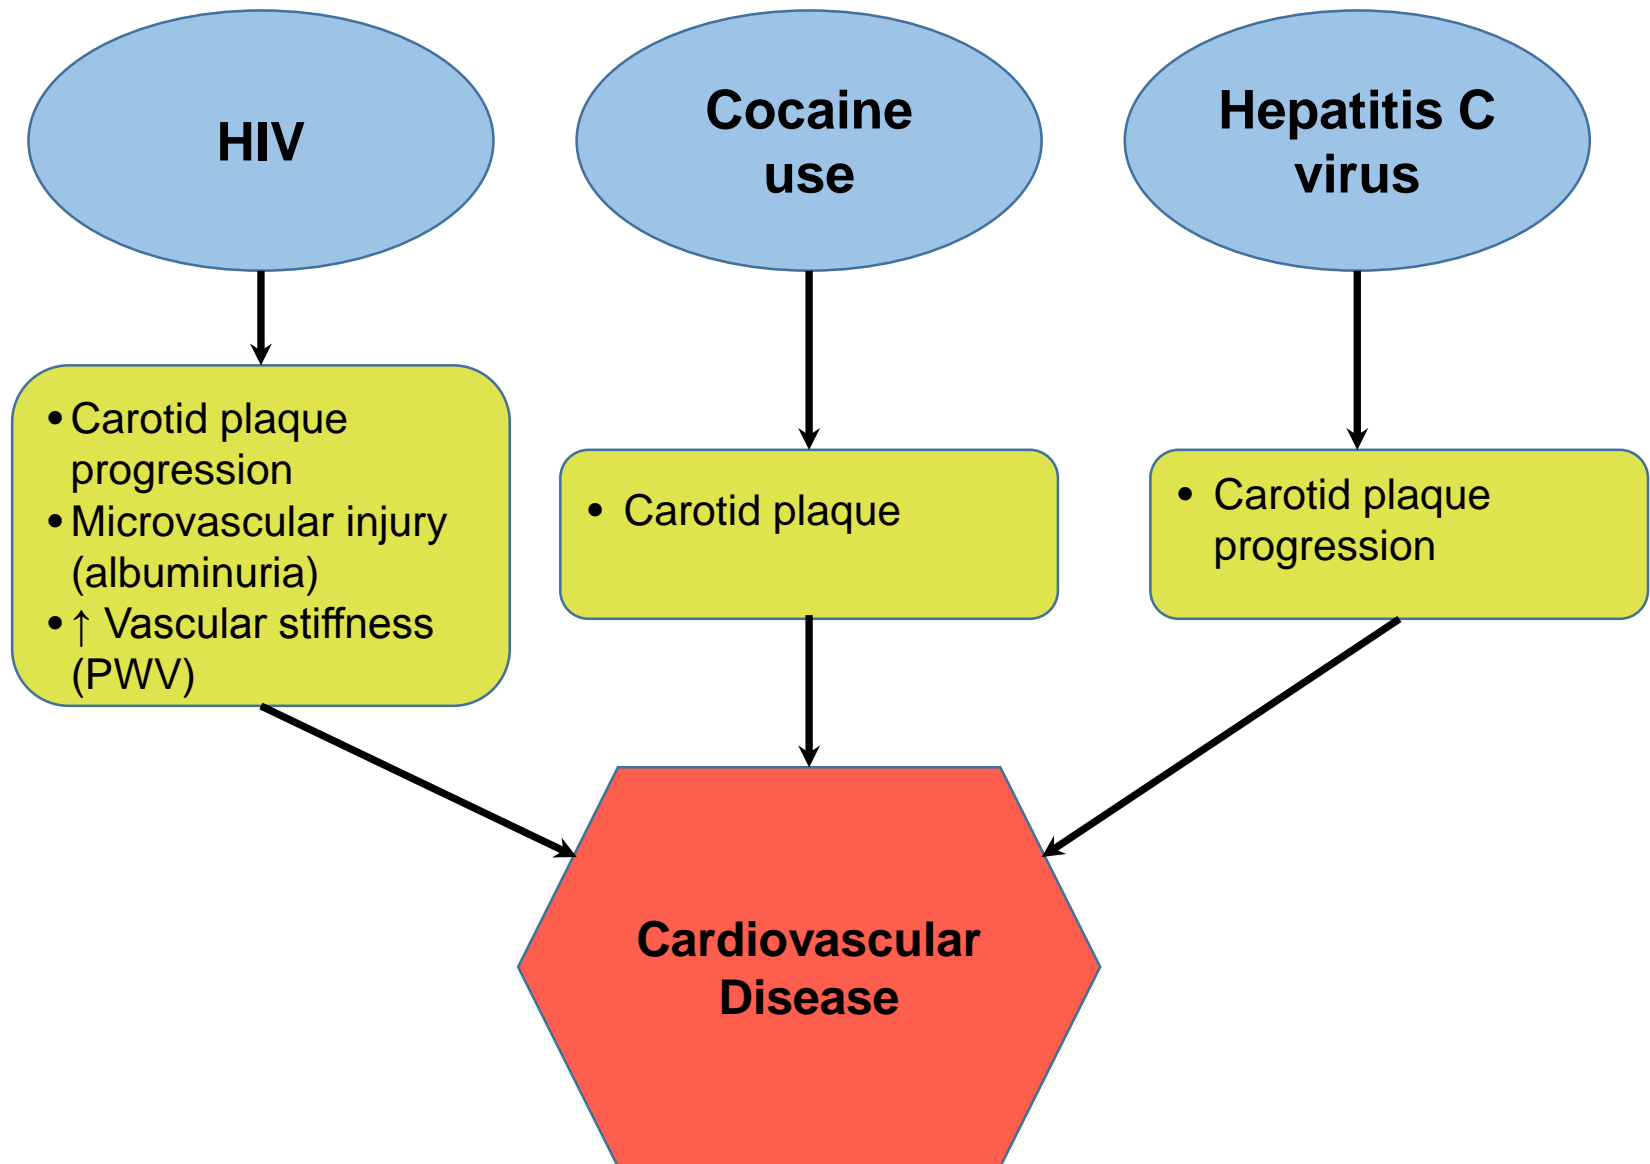

Supplement: NIHMS812662-supplement-Legacy_Supplemental_File.pdf [file NIHMS812662-supplement-Legacy_Supplemental_File.pdf]
